# Supplementary material for: Synthesis and hybridization properties ofl-oligodeoxynucleotide analogues fixed in a low anti glycosyl conformation
Source: Royal Society of Chemistry journal article supplement (doi:10.1039/b312276j), 2004-01-01
Supplement: b312276j.doc [file b312276j.doc]

**Electronic supplementary information**

**Synthesis and hybridization properties of novel L-oligodeoxynucleotide analogs fixed in a low *anti* glycosyl conformation**

Hidehito Urata,*a Hidetaka Miyagoshi,a Tetsuya Kumashiro,a Takashi Yumoto,a Keiji Mori,a Keiko Shoji,a Keigo Gohdab and Masao Akagi*a

*a Osaka University of Pharmaceutical Sciences, 4-20-1 Nasahara, Takatsuki, Osaka 569-1094, Japan. E-mail: urata@gly.oups.ac.jp*

*§Computer-Aided Molecular Modeling Research Center Kansai, 2-8-20-404, Mikagehonmachi, Higashinada-ku, Kobe, Hyogo 658-0046, Japan.*

**Characterisation data**

**(1'R,2’R,3’S,4’R-1-(4-Benzyloxy-3-benzyloxymethyl-2-hydroxycyclopentyl)uracil (4)**

Yield 53.6%; []D25 -47.55 (c 0.56 in CHCl3); H (CDCl3) 2.00-2.20 (2 H, m, 2’a-H and 2’b-H), 2.27 (1 H, m, 4’-H), 3.52-3.77 (2 H, m, 5’a-H and 5’b-H), 3.82 (1 H, br, OH), 3.92 (1 H, m, 3’-H), 4.18 (1 H, t, *J* 9.1, 6’-H), 4.40-4.55 (4 H, m, Ar-C*H2*), 4.72 (1 H, q, *J* 9.1, 1-H’), 5.63 (1 H, d, *J* 8.2, 5-H), 7.15 (1 H, d, *J* 8.2, 6-H), 7.20-7.40 (10 H, m, Ar-H), 8.92 (1 H, br s, NH); *m/z* (EI) 422.1839 (M+. C24H26N2O5 requires 422.1840).

(5aR,7R,8S,8aS)-7-Benzyloxy-8-benzyloxymethyl-5a,7,8,8a-tetrahydro-2*H*,6*H*-cyclopenta[4,5]oxazolo[3,2-*a*]pyrimidine-2-one (5)

Yield 85.2%;mp 168-170C (from ethyl acetate); []D25 –90.1 (c 0.53 in CHCl3); (Found: C, 71.27; H, 6.00; N, 6.77. C24H24N2O4 reqiures C, 71.27; H, 5.98; N, 6.92%); H (CDCl3) 2.07 (1 H, m, 2’a-H), 2.33 (1 H, ddd, *J* 13.9, 5.8, and 2.2, 2’b-H), 2.58 (1 H, m, 4’-H), 3.73 (2 H, m, 5’a-H and 5’b-H), 3.93 (1 H, m, 3’-H), 4.48 (4 H, s, Ar-C*H2*), 4.87 (1 H, m, 1’-H), 5.44 (1 H, dd, *J* 8.1 and 5.8, 6’-H), 5.97 (1 H, d, *J* 8.1, 5-H), 7.16 (1 H, d, *J* 8.1, 6-H), 7.20-7.40 (10 H, m, Ar-H); *m/z* (EI) 405.1822 (M++1. C24H25N2O4 requires 405.1815).

**1’R,2’S,3’S,4’R-1-(4-Benzyloxy-3-benzyloxymethyl-2-hydroxycyclopentyl)uracil (6)**

Yield 93.4%; []D25 +2.9 (c 0.7 in CHCl3); H (CDCl3) 1.95-2.30 (2 H, m, 2’a-H and 2’b-H), 2.37 (1 H, m, 4’-H), 3.77 (2 H, d, *J* 5.5, 5’a-H and 5’b-H), 3.86 (1 H, d, *J* 3.0, OH), 4.11 (1 H, m, 3’-H), 4.39-4.58 (5 H, m, Ar-C*H2*and 6 ’-H), 5.11 (1 H, m, 1’-H), 5.60 (1 H, d, *J* 7.6, 5-H), 7.23-7.40 (10 H, m, Ar-H), 7.48 (1 H, d, *J* 7.6, 6-H), 9.64 (1 H, br s, NH); *m/z* (EI) 422.1837 (M+. C24H26N2O5 requires 422.1840).

**(1’R,2’S,3’S,4’R-1-(4-Benzyloxy-3-benzyloxymethyl-2-hydroxycyclopentyl)-5-bromouracil (7)**

Yield 91.4%; []D25 –13.78 (c 1.0 in CHCl3); H (CDCl3) 2.05-2.30 (2 H, m, 2’a-H and 2’b-H), 2.38 (1 H, m, 4’-H), 3.78 (2 H, d, *J* 5.0, 5’a-H and 5’b-H), 3.87 (1 H, d, *J* 3.5, OH), 4.12 (1 H, m, 3’-H), 4.39-4.59 (5 H, m, Ar-C*H2*and 6’-H), 5.12 (1 H, m, 1’-H), 7.23-7.40 (10 H, m, Ar-H), 7.87 (1 H, s, 6-H), 9.69 (1 H, br s, NH); *m/z* (EI) 500.0940 (M+. C24H25N2O5Br1 requires 500.0945).

(5aR,7R,8S,8aS)-7-Benzyloxy-8-benzyloxymethyl-5a,7,8,8a-tetrahydro-2*H*,6*H*-cyclopenta[4,5]oxazolo[3,2-*c*]pyrimidine-2,4(3*H*)-dione (8)

Yield 96.8%; []D25 –265.9 (c 1.0 in CHCl3); H (CDCl3) 2.01 (1 H, m, 2’a-H), 2.52 (1 H, m, 4’-H), 2.62 (1 H, ddd, *J* 15.0, 5.8 and 1.7, 2’b-H), 3.60-3.90 (3 H, m, 3’-H and 5’a-H and 5’b-H), 4.38-4.60 (4 H, m, Ar-C*H2*), 4.89 (1 H, m, 1’-H), 5.05 (1 H, s, 5-H), 5.41 (1 H, dd, *J* 7.6 and 5.5, 6’-H), 7.20-7.40 (10 H, m, Ar-H), 9.40 (1 H, br s, NH); *m/z* (EI) 420.1684 (M+. C24H24N2O5 requires 420.1684).

(5aR,7R,8S,8aS)-5a,7,8,8a-Tetrahydro-7-hydroxy-8-hydroxymethyl-2*H*,6*H*-cyclopenta[4,5]oxazolo[3,2-*c*]pyrimidine-2,4(3*H*)-dione (1)

Yield 72.1%; mp 248-250C (from EtOH); []D25 –37.2 (c 0.5 in H2O); (Found: C, 50.19; H, 4.99; N, 11.49. C10H12N2O5 requires C, 50.00; H, 5.03; N, 11.66%); H (D2O) 1.95 (1 H, m, 2’a-H), 2.29 (1 H, m, 4’-H), 2.53 (1 H, dd, *J* 13.9 and 6.5, 2’b-H), 3.80-3.93 (2 H, m, 5’a-H and 5’b-H), 4.06 (1 H, m, 3’-H), 4.98 (1 H, t, *J* 7.6, 1’-H), 5.20 (1 H, s, 5-H), 5.54 (1 H, dd, *J* 7.6 and 5.0, 6’-H); *m/z* (SIMS) 241.0843 (M++1. C10H13N2O5 requires 241.0823).

**(1’R,2’R,3’S,4’R-9-(4-Benzyloxy-3-benzyloxymethyl-2-hydroxycyclopentyl)adenine (9)**

Yield 73.7%; mp 138-140C (from ethyl acetate); []D25 –8.35 (c 0.498, CHCl3); (Found: C, 67.48; H, 6.14; N, 15.73. C25H27N5O3 requires C, 67.40; H, 6.11; N, 15.72%); H (CDCl3)2.27-2.42 (1H, m, 2’a-H), 2.42-2.58 (2H, m, 2’b-H, 4’-H), 3.64-3.73 (2H, m, 5’a-H and 5’b-H), 4.07 (1H, m, 3’-H), 4.42 (1H, t, *J* 9.0, 6’-H), 4.50-4.64 (4H, m, Ar-C*H2* x 2), 4.77 (1H, m, 1’-H), 6.07 (2H, br s, NH2), 7.25-7.40 (10H, m, Ar-H), 7.68 (1H, s, 2-H), 8.20 (1H, s, 8-H); *m/z* (EI) 446.2189 (M++1. C25H28N5O3 requires 446.21904).

**(1’R,2’R,3’S,4’R-9-(4-Benzyloxy-3-benzyloxymethyl-2-hydroxycyclopentyl)-8-bromoadenine (10)**

Yield 78.3%; []D25 –42.17 (c 0.76 in CHCl3); H (CDCl3)2.22 (1H, m, 2’a-H), 2.40 (1H, m, 4’-H), 2.75 (1H, m, 2’b-H), 3.79 (2H, m, 5’a-H, 5’b-H), 4.10 (1H, m, 3’-H), 4.54 (2H, s, Ar-C*H2*), 4.60 (2H, s, Ar-C*H2*), 4.93 (1H, q, *J* 9.1, 1’-H), 5.07 (1H, t, *J* 9.1, 6’-H), 5.91 (2H, br s, NH2), 7.23-7.40 (10H, m, Ar-H), 7.96 (1H, s, 2-H); *m/z* (EI) 524.1298 (M++1. C25H27N5O3Br1 requires 524.1296).

**(1’R,2’R,3’S,4’R-9-[4-Benzyloxy-3-benzyloxymethyl-2-(*p*-tolylsulfonyloxy)cyclopentyl]-8-bromoadenine (11)**

Yield 96.7%; []D25 –31.15 (c 0.85 in CHCl3); H (CDCl3)2.08 (1H, m, 2’a-H), 2.29 (3H, s, Ar-C*H3*), 2.66 (1H, m, 4’-H), 2.80 (1H, m, 2’b-H) 3.73-3.88 (2H, m, 5’a-H, 5’b-H), 4.17 (1H, m, 3’-H), 4.48 (1H, d, *J* 12.1, Ar-C*H2*), 4.55 (1H, d, *J* 12.1, Ar-C*H2*), 4.59 (2H, s, Ar-C*H2*), 5.18 (1H, m, 1’-H), 5.53 (2H, br s, NH2), 5.70 (1H, t, *J* 8.5, 6’-H), 6.86 (2H, d, *J* 8.0, Ar-H), 7.23-7.46 (12H, m, Ar-H), 8.10 (1H, s, 2-H); *m/z* (EI) 677.1309 (M+. C32H32N5O5S1Br1 requires 677.1306).

**(6aS,7S,8R,9aR-8-Benzyloxy-7-benzyloxymethyl-7,8,9,9a-tetrahydro-6a*H*-cyclopenta[4,5]oxazolo[3,2-*e*]purin-4-amine (12)**

Yield 74.3%; mp 147-148C (from ethyl acetate); []D25 –195.6 (c 0.50 in CHCl3); (Found: C, 66.65; H, 5.69; N, 15.47. C25H25N5O31/3H2O requires C, 66.80; H, 5.76; N, 15.58%); H (CDCl3)2.08 (1H, m, 2’a-H), 2.54-2.73 (2H, m, H-2’b, 4’-H), 3.77-3.95 (3H, m, 3’-H, 5’a-H, 5’b-H), 4.38 (1H, d, *J* 11.3, Ar-*CH2*), 4.52 (1H, d, *J* = 11.3, Ar-C*H2*), 4.55 (2H, s, Ar-C*H2*), 5.10 (1H, m, 1’-H), 5.49 (2H, br s, NH2) 5.92 (1H, dd, *J* 7.0 and 6.0, 6’-H,), 7.20-7.40 (10H, m, Ar-H), 8.22 (1H, s, 2-H); *m/z* (EI) 443.1958 (M+. C25H25N5O3 requires 443.1955).
